# Supplementary material
Source: HighWire-hosted journal article supplement (https://adc.bmj.com/content/archdischild-2020-321045)
Supplement: inline-supplementary-material-2 [file inline-supplementary-material-2.pdf]

## Appendix 1 – Coughlan et al, 2020

**Age-standardization**

Activity rates in each healthcare setting were age-standardized for each social and ethnic group by comparison to the 2016 mid-year English population estimate. We used the proportions in the table below to calculate these figures.

| Age Group   | Population | Proportion of total study population |
|-------------|------------|--------------------------------------|
| 0-1 year    | 669,103    | 0.0673985                            |
| 1-4 years   | 2,759,943  | 0.278008                             |
| 5-9 years   | 3,428,266  | 0.3453279                            |
| 10-14 years | 3,070,254  | 0.3092655                            |
| Total       | 9,927,566  | 1                                    |

**Missing Data**

Only a small portion of data were missing for our analysis by level of deprivation (accounting for 0.5% of study sample in 2007/8 and 2.2% in 2016/17). These data are summarised for the years 2007 and 2016/17 in the table below.

| IMD Group          | 2007/8 | Percentage total study population | 2016/17 | Percentage total study population |
|--------------------|--------|-----------------------------------|---------|-----------------------------------|
| 1 (least deprived) | 119952 | 22.9                              | 63017   | 23.8                              |
| 2                  | 106334 | 20.3                              | 48034   | 18.1                              |
| 3                  | 103818 | 19.8                              | 47562   | 18.0                              |
| 4                  | 96133  | 18.3                              | 51103   | 19.3                              |
| 5 (most deprived)  | 96061  | 18.3                              | 49313   | 18.6                              |
| Missing            | 2633   | <b>0.5</b>                        | 5926    | <b>2.2</b>                        |
| Total              | 524931 | 100                               | 264955  | 100                               |

The table below presents ethnicity data, including missing data, with reference to official statistics on membership of different ethnic groups by sex and age, as held by the UK Office for National Statistics (ONS). These data are freely available at:

<https://www.ons.gov.uk/peoplepopulationandcommunity/culturalidentity/ethnicity/adhocs/009102ethnicitybysexandagesinenglandandwales2011to2015>

| Ethnicity Allocation | 2007   | Percentage total study population | 2016   | Percentage total study population | ONS estimate – percentage total population of England for CYP aged 0-14 years |
|----------------------|--------|-----------------------------------|--------|-----------------------------------|-------------------------------------------------------------------------------|
| White                | 315629 | 60.1                              | 181452 | 68.5                              | 77.8                                                                          |
| Black                | 9543   | 1.8                               | 10000  | 3.8                               | 4.2                                                                           |
| Asian                | 17035  | 3.2                               | 15257  | 5.8                               | 9.6                                                                           |
| Mixed                | 8414   | 1.6                               | 9845   | 3.7                               | 5.4                                                                           |
| Other                | 41992  | 8.0                               | 16013  | 6.0                               | 2.9                                                                           |
| Missing              | 132318 | 25.5                              | 32388  | 12.2                              | N/A                                                                           |
| Total                | 524931 | 100                               | 264955 | 100                               | 100                                                                           |

## Appendix 1 – Coughlan et al, 2020

The completeness of our ethnicity dataset increased from almost 75% in 2007/8 to 87.8% in 2016/17. The significant attrition in the size of our study population – for both IMD and ethnic group analyses – over the study period has been described in other studies employing CPRD data (see manuscript, reference 36) and reflects the transition of GP practices to new electronic patient records.
